# Supplementary material for: Inflammatory Stimuli Reprogram Macrophage Phagocytosis to Macropinocytosis for the Rapid Elimination of Pathogens
Source: PubMed Central journal article supplement (PMC3907376; doi:10.1371/journal.ppat.1003879), 2014-01-30

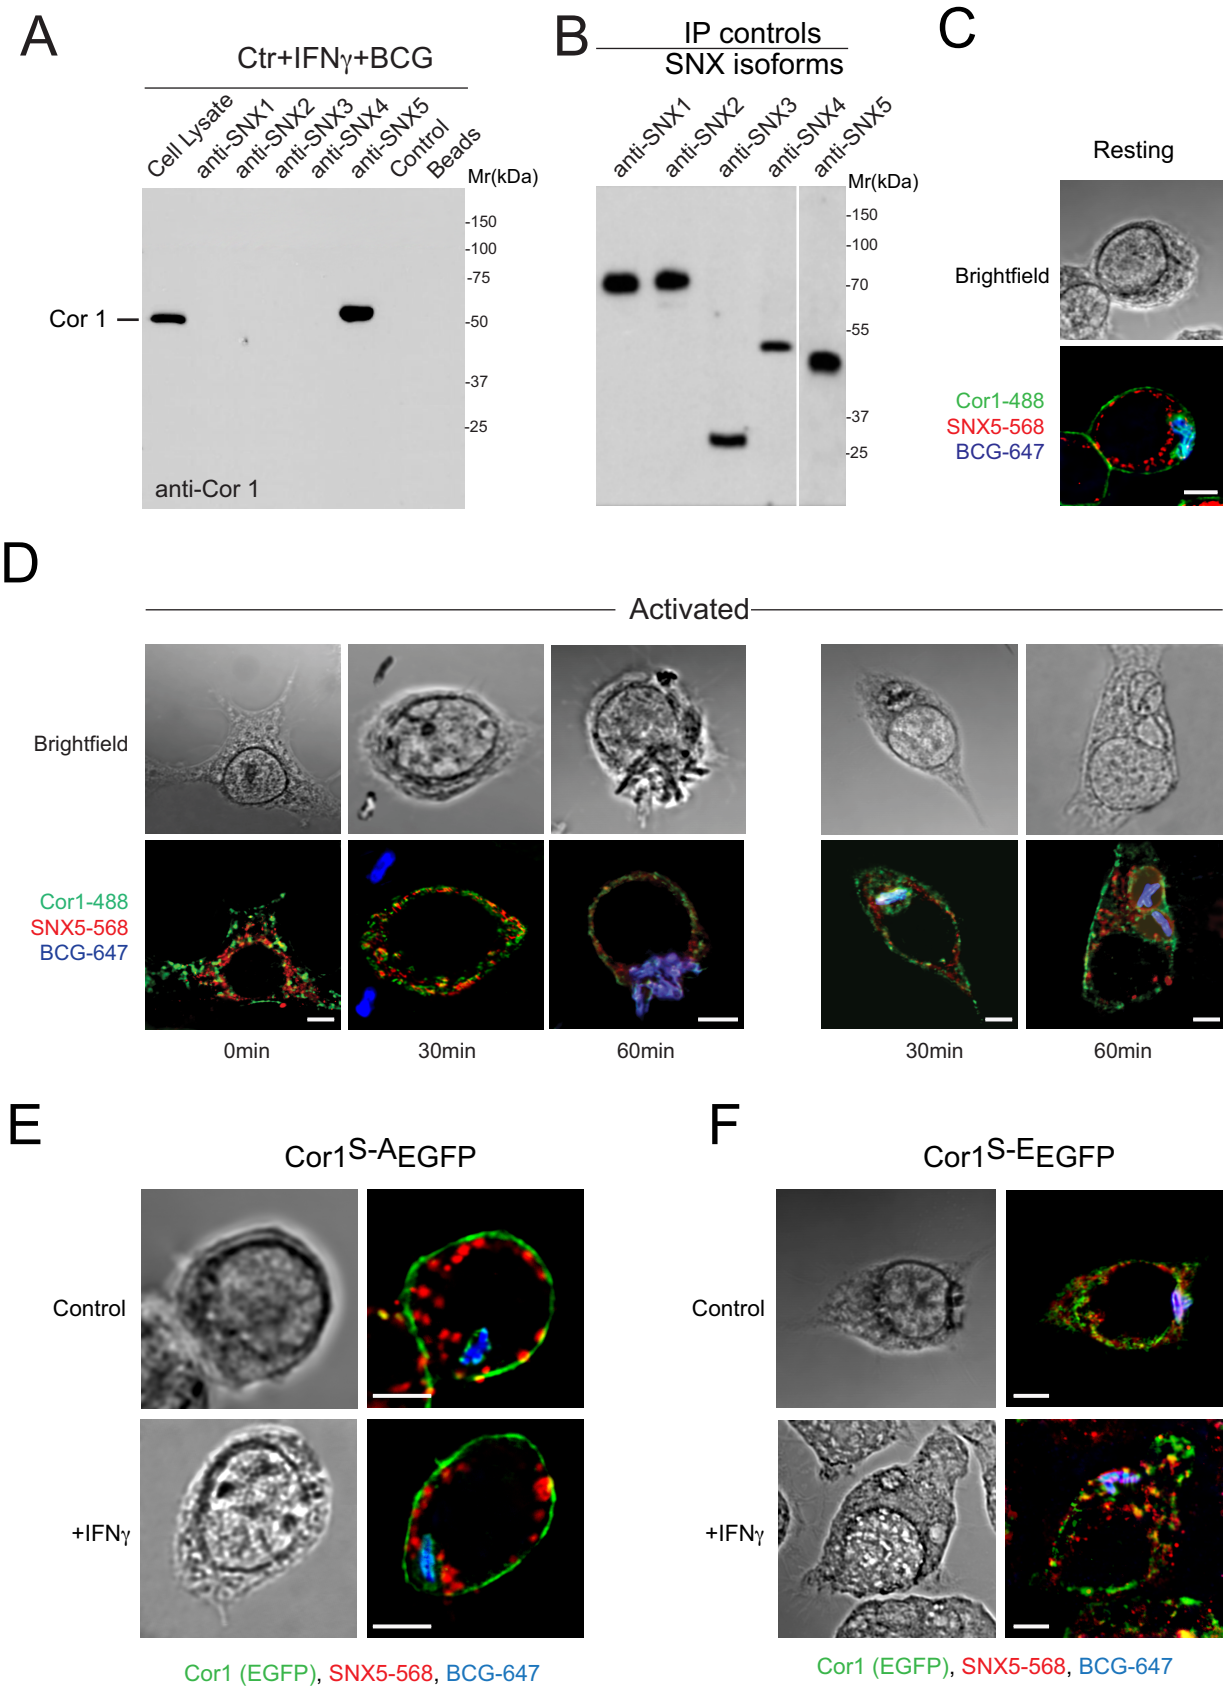

Supplement: ppat.1003879.s006.pdf [file ppat.1003879.s006.pdf]
