# Supplementary material for: Inflammatory Stimuli Reprogram Macrophage Phagocytosis to Macropinocytosis for the Rapid Elimination of Pathogens
Source: PubMed Central journal article supplement (PMC3907376; doi:10.1371/journal.ppat.1003879), 2014-01-30
Supplement: ppat.1003879.s011.pdf [file ppat.1003879.s011.pdf]

**Table S1**

| <b>Primer</b>  | <b>Strand</b> | <b>Sequence</b>                         |
|----------------|---------------|-----------------------------------------|
| <b>S9A</b>     | sense         | GGTGGTTCGCTCCGCCAAATTCCGCCACG           |
|                | antisense     | CGTGGCGGAATTTGGCGGAGCGAACCACC           |
| <b>S9E</b>     | sense         | GGTGGTTCGCTCCGAGAAATTCCGCCACG           |
|                | antisense     | CGTGGCGGAATTTCTCGGAGCGAACCACC           |
| <b>S311A</b>   | sense         | GCATTATCTTTCCATGTTCCGCTTCCAAGGAGTCTC    |
|                | antisense     | GAGACTCCTTGGAAAGCGAACATGGAAAGATAATGC    |
| <b>S311E</b>   | sense         | GCATTATCTTTCCATGTTCCGAGTCCAAGGAGTCTC    |
|                | antisense     | GAGACTCCTTGGACTCGAACATGGAAAGATAATGC     |
| <b>S356A</b>   | sense         | GACAGTGCCTAGAAAGGCGGACCTGTTCCAG         |
|                | antisense     | CTGGAACAGGTCCGCCTTTCTAGGCACTGTC         |
| <b>S356E</b>   | sense         | GACAGTGCCTAGAAAGGAGGACCTGTTCCAG         |
|                | antisense     | CTGGAACAGGTCCCTCCTTTCTAGGCACTGTC        |
| <b>S412A</b>   | sense         | CAGGGGCCTGGACGCCGCTCGCAGAAGAGC          |
|                | antisense     | GCTCTTCTGCGAGCGGCGTCCAGGCCCTG           |
| <b>S412E</b>   | sense         | CAGGGGCCTGGACGAGGCTCGCAGAAGAGC          |
|                | antisense     | GCTCTTCTGCGAGCCTCGTCCAGGCCCTG           |
| <b>mutRNAi</b> | sense         | CCCCTAGGCAAGACTGGACGTGTGGACAAGAACGTGCCC |
|                | antisense     | GGCACGTTCTTGTCCACACGTCCAGTCTTGCCTAGGGG  |

Table S1: Primers for site directed mutagenesis of Protein kinase C phosphorylated serines in coronin 1 and shRNA mutants of the coronin1-EGFP mutants.
